# Supplementary material for: Evidence for L1-associated DNA rearrangements and negligible L1 retrotransposition in glioblastoma multiforme
Source: Springer Nature journal article supplement (doi:10.1186/s13100-016-0076-6), 2016-11-10

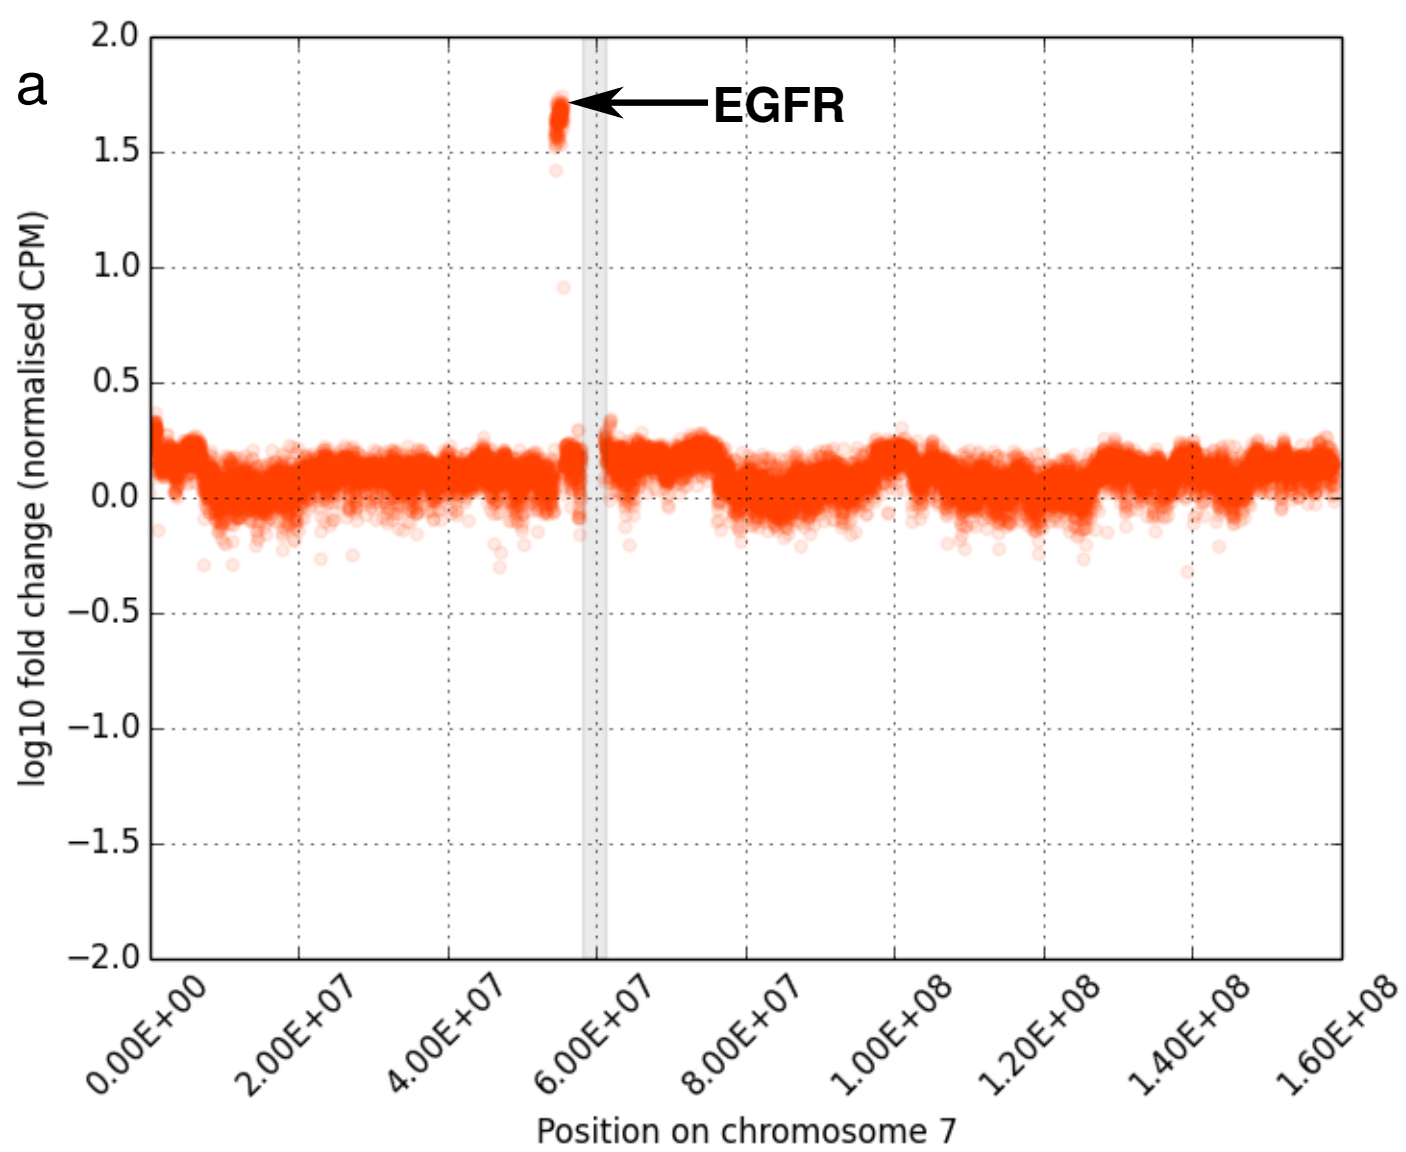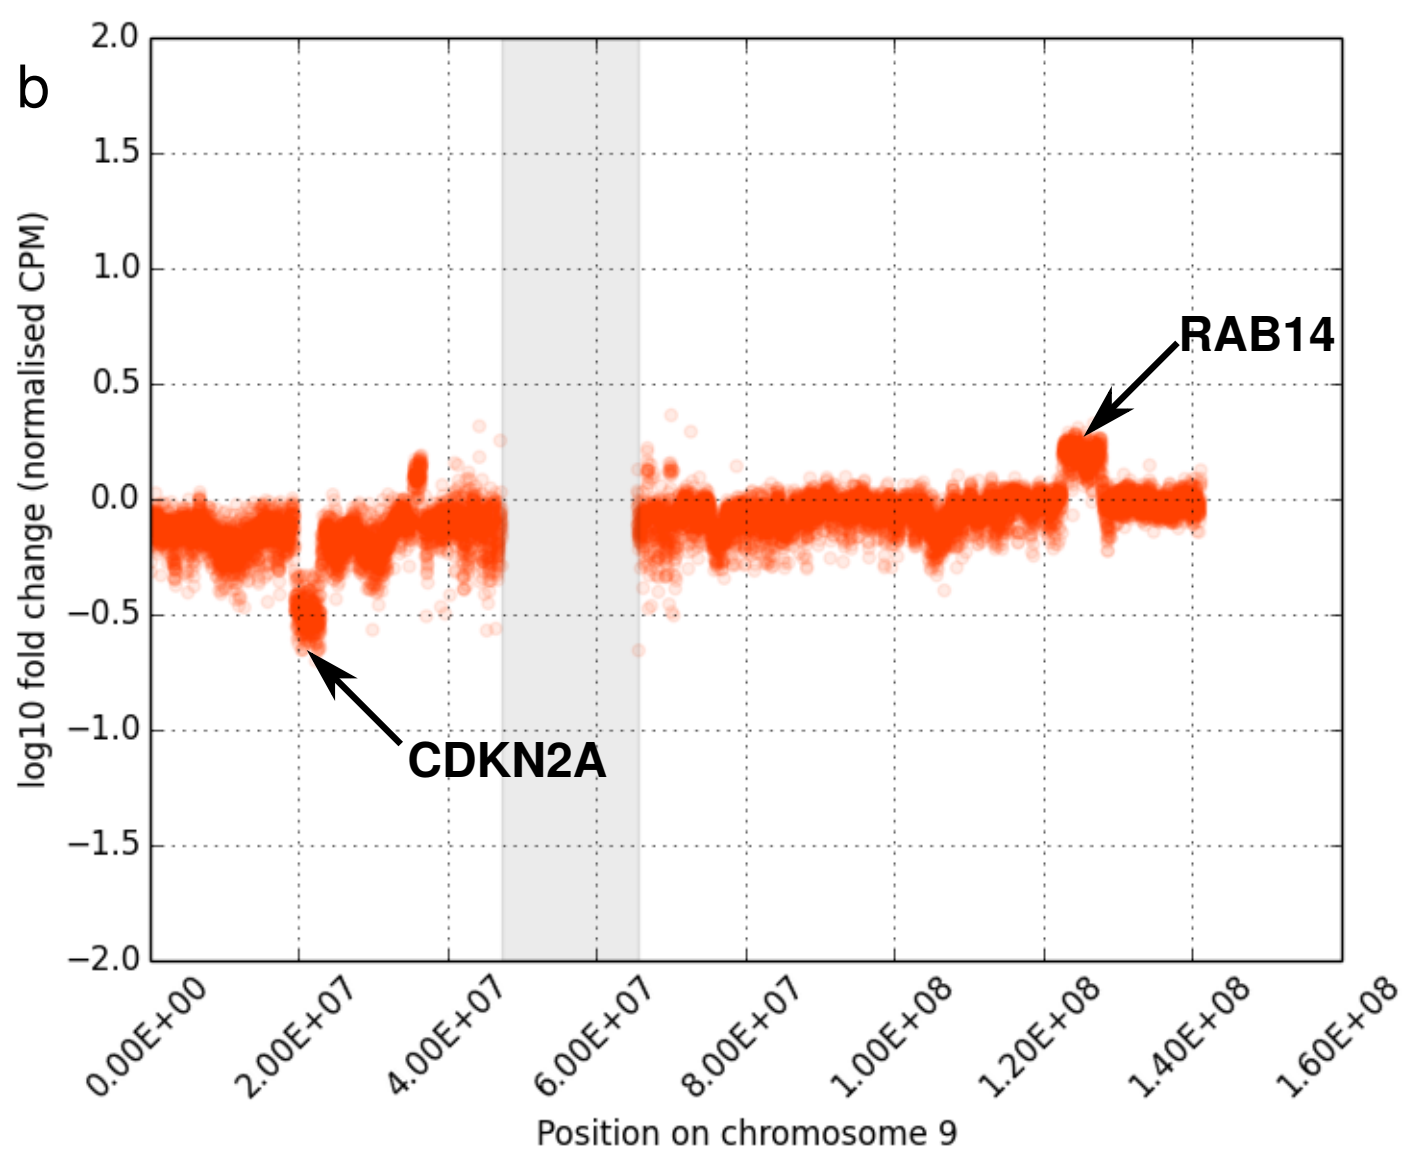

Supplement: MOESM6 [file 13100_2016_76_MOESM6_ESM.pdf]
